# Supplementary material
Source: PubMed Central journal article supplement (PMC7141408)
Supplement: jciinsight-5-134539-s026.pdf [file jciinsight-5-134539-s026.pdf]

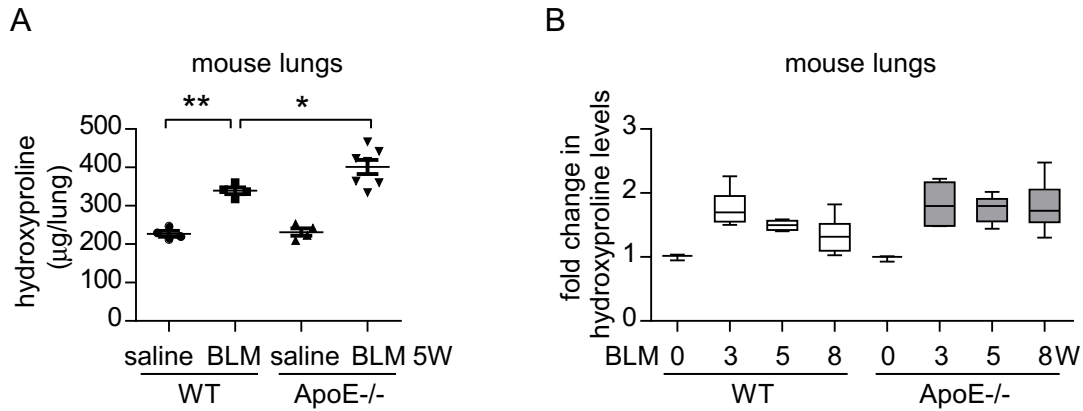

**Supplemental Figure 1. ApoE is required for the resolution of bleomycin induced pulmonary fibrosis.** (A) 6-week old wild-type and ApoE<sup>-/-</sup> mice were i.t. instilled with saline or bleomycin (BLM, 1.5 U/kg in 50 µl saline). 5 weeks after treatment, mice were sacrificed and the levels of hydroxyproline in the lungs were determined. n=4, 4, 4, 7 mice for each group, respectively; mean±SEM; \*  $p < 0.05$ , \*\*  $p < 0.01$  by 1-way ANOVA with Bonferroni's post hoc test. (B) 6-week old wild-type and ApoE<sup>-/-</sup> mice were i.t. instilled with saline or bleomycin (BLM, 1.5 U/kg in 50 µl saline). 3, 5 and 8 weeks after treatment, mice were sacrificed and the relative hydroxyproline levels in the lungs were evaluated. n=3, 7, 4, 11, 3, 6, 7, 12 mice for each group, respectively.

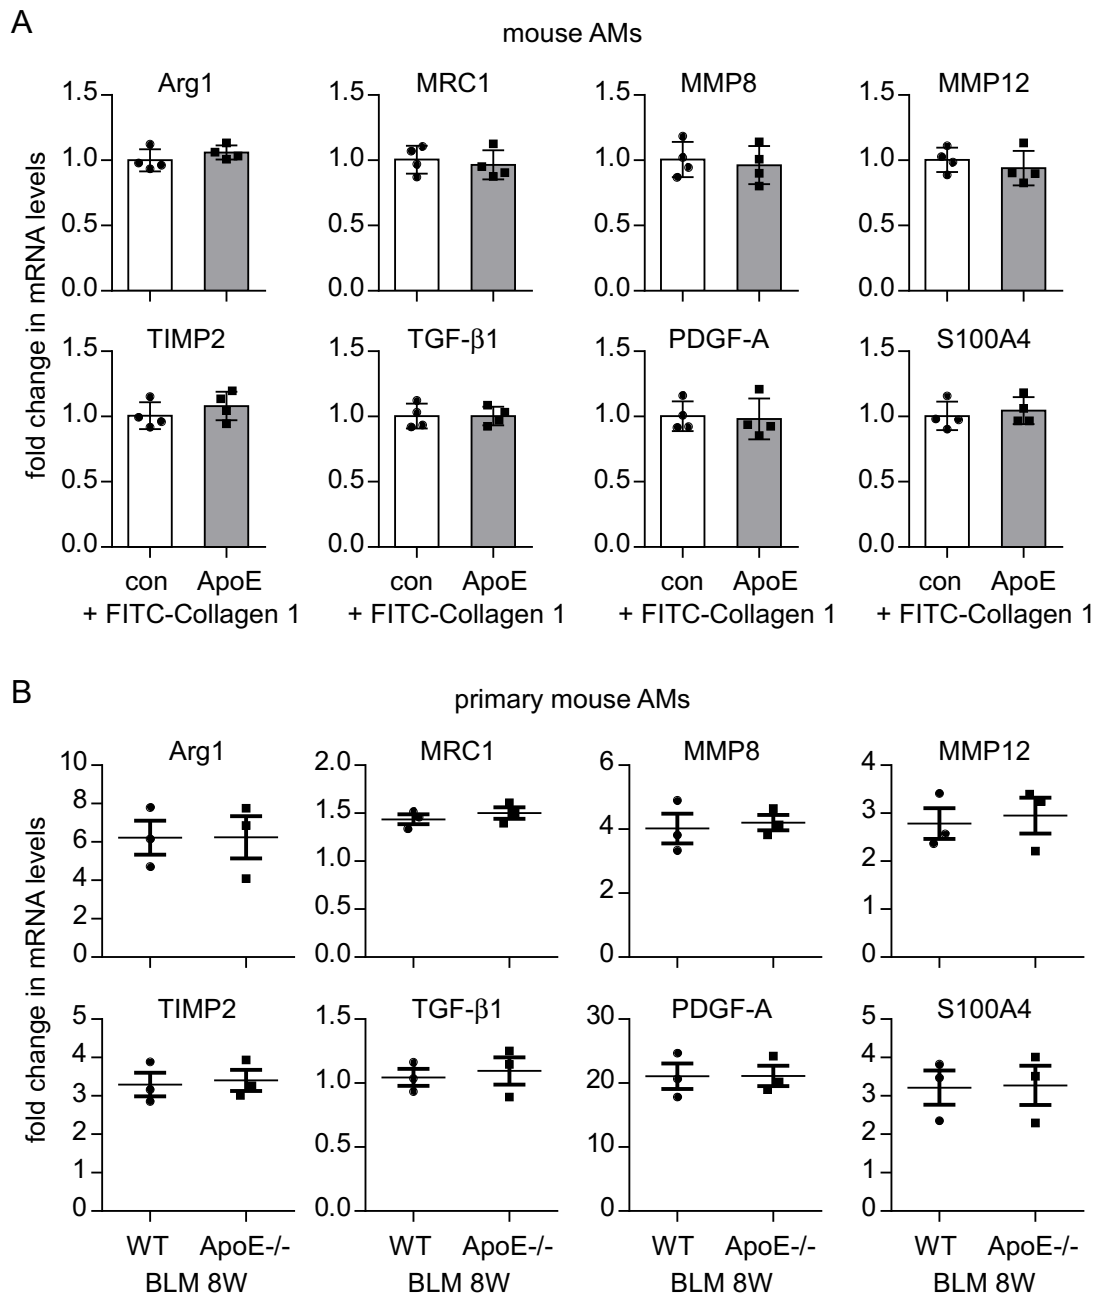

**Supplemental Figure 2. ApoE regulated Collagen I uptake demonstrates no effect on the expression of the pro-fibrotic phenotype or mediators in alveolar macrophages.** (A) FITC-conjugated type I Collagen (50  $\mu$ g/ml) was pre-incubated with conditioned media with or without mouse ApoE. The protein mixtures were then incubated with mouse alveolar macrophages for 4h at 37°C. Total RNAs were isolated and levels of the indicated genes determined by real-time PCR. n=4 for each group; mean $\pm$ SD. (B) 6-week old wild-type and ApoE<sup>-/-</sup> mice were i.t. instilled with saline or bleomycin (BLM, 1.5 U/kg in 50  $\mu$ l saline). 8 weeks after treatment, mice were sacrificed and AMs isolated. Total RNAs were purified and levels of the indicated genes determined by real-time PCR. n=3, 3; mean $\pm$ SEM.

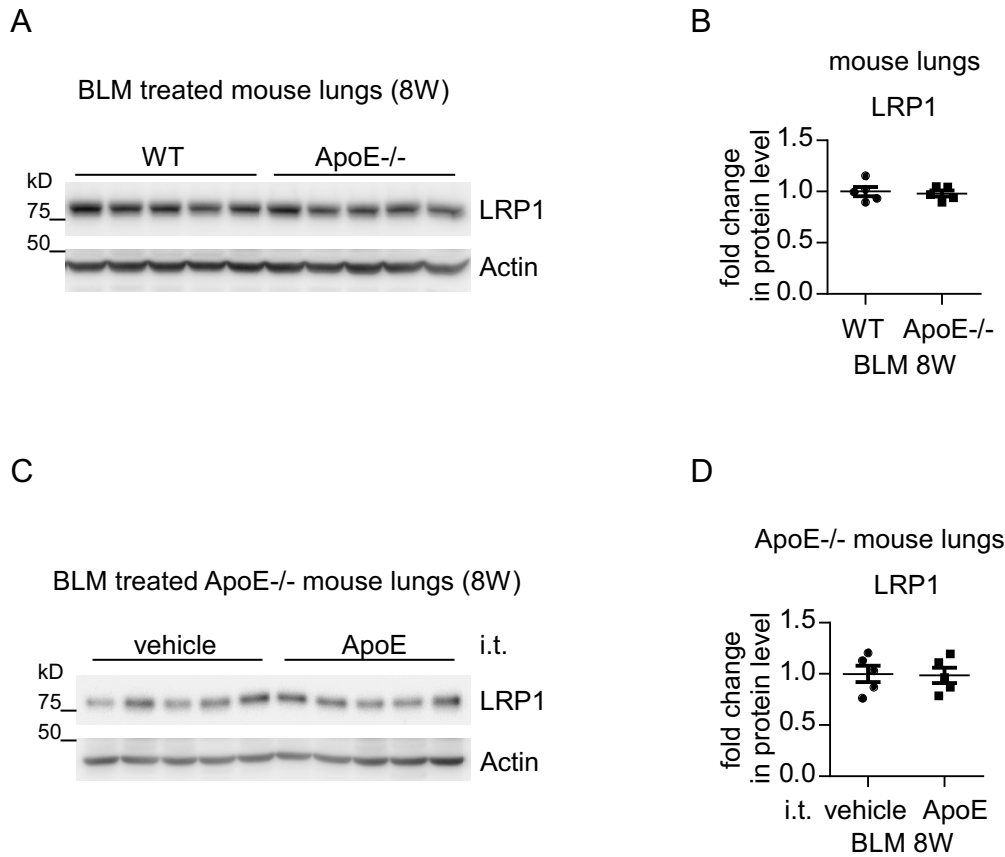

**Supplemental Figure 3. ApoE does not affect the pulmonary LRP1 level during lung fibrosis.** (A-B) 6-week old wild-type and ApoE<sup>-/-</sup> mice were i.t. instilled with bleomycin (BLM, 1.5 U/kg in 50  $\mu$ l saline). 8 weeks after treatment, mice were sacrificed and lungs harvested. LRP1 protein levels in the lungs were determined by Western blotting (A) and densitometric analyses performed using ImageJ (B).  $n=5, 5$ ; mean $\pm$ SEM. (C-D) 6-week old ApoE<sup>-/-</sup> mice were i.t. instilled with bleomycin (BLM, 1.5 U/kg in 50  $\mu$ l saline). Starting at 4 weeks after bleomycin treatment, mice were treated i.t. ApoE (1  $\mu$ g in 50  $\mu$ l saline) or saline alone, once every other day. 8 weeks after bleomycin injection, mice were sacrificed and lungs harvested. LRP1 protein levels in the lungs were determined by Western blotting (C) and densitometric analyses performed using ImageJ (D).  $n=5, 5$ ; mean $\pm$ SEM.

**Supplemental Table 1.** List of primer sequences used for real-time PCR

| <b>Gene</b>        | <b>Sense (5'-3')</b>       | <b>Antisense (5'-3')</b>     |
|--------------------|----------------------------|------------------------------|
| <b>Mouse</b>       |                            |                              |
| Tubulin $\alpha$ 1 | GGATGCTGCCAATAACTATGCTCGT  | GCCAAAGCTGTGGAAAACCAAGAAG    |
| ApoE               | CTGGTTCGAGCCAATAGTGGAAGAC  | CTGGATATGGATGTTGTTGCAGGAC    |
| Col1A1             | GGAGGGCGAGTGCTGTGCTTT      | GGGACCAGGAGGACCAGGAAGT       |
| Col3A1             | CAATCCAGGTCCTCCAGGTTCTCC   | ATGCCCACTTGTTCCATCTTTTCC     |
| Fn                 | TCTGGGAAATGGAAAAGGGGAATGG  | CACTGAAGCAGGTTTCTCTCGGTTGT   |
| Eln                | TGGAAACCCACAGGACAAGGAAATC  | CCCCACAAAGAAGAAGCACCAACAT    |
| Mertk              | CAGTGAATATCATCATTCTGAACACA | CCAGAGAAATACACAAAATTAACCCG   |
| Siglec-F           | CCAAGGACAGCAAGTGTTAGAAGC   | ATTACAGAAGAGGAAGAGAGGGCA     |
| Cx3cr1             | ACCCCTTTATCTACGCCTTTGCCG   | AGAGACCCATCTCCCTCGCTTGTG     |
| Arg-1              | TGACTGAAGTAGACAAGCTGGGGAT  | CGACATCAAAGCTCAGGTGAATCGG    |
| MRC1               | GGCAGTCACCATATTTTATTGGC    | GCAAAGTTGGGTTCTCCTGTAGCC-    |
| MMP8               | GGTACCCCAAAGCATACCAAGC     | CTCTGTGACTGACAAAATTAATGCAAAA |
| MMP12              | CACTCCCAGGAATCAAGCCTAAAAT  | AAAACCAGCAAGCACCCCTTACTACA   |
| TIMP2              | GCAACCCCATCAAGAGGATTCAAGT  | CTTCTGGGTGATGCTAAGCGTGTG     |
| TGF- $\beta$ 1     | ACGCCTGAGTGGCTGTCTTTTGA    | GTTTGGGGCTGATCCCGTTGATT      |
| PDGF-A             | CTGTTGTAACACCAGCAGCGTCAAGT | CATTGGCAATGAAGCACCATACATAG   |
| S100A4             | TCCACAAATACTCAGGCAAAGAGGG  | TGTTGCTGTCCAAGTTGCTCATCAC    |
| <b>Human</b>       |                            |                              |
| Tubulin $\beta$ 1  | TGGAATCTGTTGCTCAGGTCCTT    | AGTGGCCTTTGGCCAGTTGTTAC      |
| Col1A1             | AGGGCGACAGAGGCATAAAGGG     | GGGACCAACAGGACCAGCATCAC      |
| Col3A1             | ATGCGGATAGAGATGTCTGGAAGC   | TGACCATTAGGAGGGCGAGTAGGA     |
| Fn                 | GTGTTGGGAATGGTCGTGGGGAATG  | CCAATGCCACGGCCATAGCAGTAGC    |
| $\alpha$ -SMA      | CATCACCAACTGGGACGACATGGAA  | GCATAGCCCTCATAGATGGGGACATTG  |
